# Supplementary material
Source: PubMed Central journal article supplement (PMC3228050)
Supplement: supp_the2010-0227_Ladoire_supplemental_data.pdf [file supp_the2010-0227_Ladoire_supplemental_data.pdf]

**Supplemental online Table 1: Univariate (n = 113) and multivariate (n = 105) analyses for factors associated with time to progression in the whole population.**

|                                             | Univariate HR | IC 95%      | p       | Harrell's C | Multivariate HR | IC 95%      | p      | Bootstrapping 95% CI and p-value |
|---------------------------------------------|---------------|-------------|---------|-------------|-----------------|-------------|--------|----------------------------------|
| <b>Treatment</b>                            |               |             |         |             |                 |             |        |                                  |
| antiangiogenic                              | 1             |             |         |             |                 |             |        |                                  |
| cytokine                                    | 2.27          | [1.47-3.50] | <0.0001 | 0.5937      |                 |             |        |                                  |
| <b>MSKCC group</b>                          |               |             |         |             |                 |             |        |                                  |
| 1                                           | 1             |             |         |             | 1               |             |        |                                  |
| 2                                           | 1.44          | [0.92-2.27] |         |             | 1.88            | [1.16-3.05] | 0.010  | [1.03-3.33] 0.030                |
| 3                                           | 3.06          | [1.39-6.73] | 0.0168  | 0.5800      | 2.42            | [1.07-5.49] | 0.035  | [0.72-8.12] 0.153                |
| <b>LDH</b>                                  |               |             |         |             |                 |             |        |                                  |
| < 1.5 ULN                                   | 1             |             |         |             |                 |             |        |                                  |
| > 1.5 ULN                                   | 1.98          | [1.16-3.40] | 0.0130  | 0.5488      |                 |             |        |                                  |
| <b>Hemoglobin</b>                           |               |             |         |             |                 |             |        |                                  |
| > LLN                                       | 1             |             |         |             |                 |             |        |                                  |
| < LLN                                       | 1.87          | [1.11-3.13] | 0.0180  | 0.5455      |                 |             |        |                                  |
| <b>BMI</b>                                  |               |             |         |             |                 |             |        |                                  |
| <25                                         | 1             |             |         |             |                 |             |        |                                  |
| 25-30                                       | 1.47          | [0.88-2.54] |         |             |                 |             |        |                                  |
| >30                                         | 1.51          | [0.88-2.59] | 0.249   | 0.525       |                 |             |        |                                  |
| <b>Interaction BMI x Treatment</b>          |               |             | 0.0005  | 0.6452      |                 |             |        |                                  |
| Cyto x BMI <25                              | 1             |             |         |             |                 |             |        |                                  |
| Cyto x BMI 25-30                            | 0.62          | [0.31-1.24] | 0.471   |             |                 |             |        |                                  |
| Cyto x BMI >30                              | 0.77          | [0.38-1.58] | 0.510   |             |                 |             |        |                                  |
| AA x BMI <25                                | 0.19          | [0.09-0.38] | <0.0001 |             |                 |             |        |                                  |
| AA x BMI 25-30                              | 0.61          | [0.32-1.20] | 0.120   |             |                 |             |        |                                  |
| AA x BMI >30                                | 0.58          | [0.29-1.17] | 0.184   |             |                 |             |        |                                  |
| <b>SFA</b>                                  |               |             |         |             |                 |             |        |                                  |
| ≤ 17996                                     | 1             |             |         |             |                 |             |        |                                  |
| > 17996                                     | 1.15          | [0.74-1.80] | 0.5270  | 0.4956      |                 |             |        |                                  |
| <b>Interaction SFA x Treatment</b>          |               |             | 0.0002  | 0.6308      |                 |             |        |                                  |
| Cyto x SFA ≤ 17996                          | 1             |             |         |             |                 |             |        |                                  |
| Cyto x SFA > 17996                          | 0.57          | [0.31-1.05] | 0.07    |             |                 |             |        |                                  |
| AA x SFA ≤ 17996                            | 0.23          | [0.12-0.45] | <0.0001 |             |                 |             |        |                                  |
| AA x SFA > 17996                            | 0.50          | [0.28-0.90] | 0.0210  |             |                 |             |        |                                  |
| <b>VFA</b>                                  |               |             |         |             |                 |             |        |                                  |
| ≤13349                                      | 1             |             |         |             |                 |             |        |                                  |
| >13349                                      | 1.77          | [1.13-2.77] | 0.0130  | 0.5768      |                 |             |        |                                  |
| <b>Interaction VFA x Treatment</b>          |               |             | 0.0002  | 0.6392      |                 |             | 0.0005 | [1.18-10.55] 0.024               |
| Cyto & VFA ≤ 13349                          | 1             |             |         |             | 1               |             |        |                                  |
| Cyto & VFA > 13349                          | 0.88          | [0.48-1.58] | 0.66    |             | 1.03            | [0.56-1.90] | 0.914  | [0.48-2.24] 0.932                |
| AA & VFA ≤ 13349                            | 0.24          | [0.12-0.47] | <0.0001 |             | 0.25            | [0.12-0.49] | <0.001 | [0.11-0.54] 0.001                |
| AA & VFA > 13349                            | 0.79          | [0.44-1.42] | 0.4220  |             | 0.90            | [0.49-1.64] | 0.727  | [0.40-2.54] 0.797                |
| <b>Harrell's C-statistic</b>                |               |             |         |             |                 |             |        | 0.6921                           |
| <b>AIC</b>                                  |               |             |         |             |                 |             |        | 602,42                           |
| Cyto = cytokines, AA= antiangiogenic agents |               |             |         |             |                 |             |        |                                  |

**Supplemental online Table 2:** Univariate (n=113) and Multivariate (n=105) analyses for factors associated with overall survival in the whole population.

|                                      | Univariate HR | IC 95%      | p       | Harrell's C | Multivariate HR | IC 95%       | p      | Bootstrapping 95% CI and p value |
|--------------------------------------|---------------|-------------|---------|-------------|-----------------|--------------|--------|----------------------------------|
| <b>Nephrectomy</b>                   |               |             |         |             |                 |              |        |                                  |
| Yes                                  | 1             |             |         |             |                 |              |        |                                  |
| No                                   | 3.12          | [1.72-5.64] | <0.0001 | 0.588       |                 |              |        |                                  |
| <b>Karnofski (%)</b>                 |               |             |         |             |                 |              |        |                                  |
| ≥ 80                                 | 1             |             |         |             |                 |              |        |                                  |
| < 80                                 | 2.67          | [1.49-4.79] | 0.001   | 0.591       |                 |              |        |                                  |
| <b>LDH</b>                           |               |             |         |             |                 |              |        |                                  |
| < 1.5 ULN                            | 1             |             |         |             |                 |              |        |                                  |
| ≥ 1.5 ULN                            | 1.80          | [0.98-3.30] | 0.05    | 0.547       |                 |              |        |                                  |
| <b>Hemoglobin</b>                    |               |             |         |             |                 |              |        |                                  |
| ≥ LLN                                | 1             |             |         |             |                 |              |        |                                  |
| < LLN                                | 1.95          | [1.12-3.39] | 0.018   | 0.565       |                 |              |        |                                  |
| <b>Serum corrected calcium</b>       |               |             |         |             |                 |              |        |                                  |
| ≤ ULN                                | 1             |             |         |             |                 |              |        |                                  |
| > ULN                                | 2.08          | [1.23-3.54] | 0.007   | 0.579       |                 |              |        |                                  |
| <b>Platelets</b>                     |               |             |         |             |                 |              |        |                                  |
| < ULN                                | 1             |             |         |             |                 |              |        |                                  |
| ≥ ULN                                | 2.25          | [1.25-4.06] | 0.007   | 0.564       |                 |              |        |                                  |
| <b>CRP</b>                           |               |             |         |             |                 |              |        |                                  |
| < 50 mg/L                            | 1             |             |         |             |                 |              |        |                                  |
| ≥ 50 mg/L                            | 1.79          | [1.05-3.06] | 0.032   | 0.573       |                 |              |        |                                  |
| <b>Metastatic sites</b>              |               |             |         |             |                 |              |        |                                  |
| 1                                    | 1             |             |         |             | 1               |              |        |                                  |
| > 1                                  | 1.72          | [1.02-2.91] | 0.041   | 0.547       | 2.29            | [1.25-4.212] | 0.008  | [1.07-4.89] 0.032                |
| <b>Antiangiogenic at progression</b> |               |             |         |             |                 |              |        |                                  |
| Yes                                  | 1             |             |         |             | 1               |              |        |                                  |
| No                                   | 1.75          | [2.86-1.07] | 0.024   | 0.592       | 1.92            | [1.09-3.36]  | 0.023  | [0.86-4.25] 0.110                |
| <b>MSKCC group</b>                   |               |             |         |             |                 |              |        |                                  |
| 1                                    | 1             |             |         |             | 1               |              |        |                                  |
| 2                                    | 1.95          | [1.17-3.26] |         |             | 4.23            | [1.67-10.27] | 0.002  | [0.72-24.94] 0.111               |
| 3                                    | 7.17          | [3.12-16.5] | <0.0001 | 0.652       | 2.39            | [1.36-4.19]  | 0.003  | [1.23-4.63] 0.010                |
| <b>BMI</b>                           |               |             |         |             |                 |              |        |                                  |
| <25                                  | 1             |             |         |             |                 |              |        |                                  |
| 25-30                                | 1.50          |             |         |             |                 |              |        |                                  |
| >30                                  | 1.10          | [0.81-2.09] | 0.346   | 0.542       |                 |              |        |                                  |
| <b>Interaction BMI x Treatment</b>   |               |             | 0.140   | 0.6124      |                 |              |        |                                  |
| Cyto x BMI <25                       | 1             |             |         |             |                 |              |        |                                  |
| Cyto x BMI 25-30                     | 0.83          | [0.39-1.79] | 0.254   |             |                 |              |        |                                  |
| Cyto x BMI > 30                      | 0.64          | [0.29-1.37] | 0.3180  |             |                 |              |        |                                  |
| AA x BMI <25                         | 0.39          | [0.18-0.86] | 0.0190  |             |                 |              |        |                                  |
| AA x BMI 25-30                       | 1.23          | [0.59-2.56] | 0.6201  |             |                 |              |        |                                  |
| AA x BMI >30                         | 0.90          | [0.40-2.11] | 0.6990  |             |                 |              |        |                                  |
| <b>SFA</b>                           |               |             |         |             |                 |              |        |                                  |
| ≤ 17996                              | 1             |             |         |             |                 |              |        |                                  |
| > 17996                              | 1.07          | [0.65-1.76] | 0.7860  | 0.5177      |                 |              |        |                                  |
| <b>Interaction SFA x Treatment</b>   |               |             | 0.1092  | 0.5916      |                 |              |        |                                  |
| Cyto x SFA ≤ 17996                   | 1             |             |         |             |                 |              |        |                                  |
| Cyto x SFA > 17996                   | 0.62          | [0.32-1.22] | 0.1660  |             |                 |              |        |                                  |
| AA x SFA ≤ 17996                     | 0.44          | [0.21-0.93] | 0.0320  |             |                 |              |        |                                  |
| AA x SFA > 17996                     | 0.95          | [0.50-1.82] | 0.8780  |             |                 |              |        |                                  |
| <b>VFA</b>                           |               |             |         |             |                 |              |        |                                  |
| ≤13349                               | 1             |             |         |             |                 |              |        |                                  |
| >13349                               | 1.46          | [0.88-2.40] | 0.1400  | 0.5825      |                 |              |        |                                  |
| <b>Interaction VFA x Treatment</b>   |               |             | 0.0113  | 0.647       |                 |              | 0.0168 | [1.73-35.24] 0.008               |
| Cyto x VFA ≤ 13349                   | 1             |             |         |             | 1               |              |        |                                  |
| Cyto x VFA > 13349                   | 0.71          | [0.37-1.37] | 0.3030  |             | 0.65            | [0.32-1.308] | 0.228  | [0.24-1.73] 0.388                |
| AA x VFA ≤ 13349                     | 0.36          | [0.16-0.79] | 0.0110  |             | 0.25            | [0.11-0.603] | 0.002  | [0.10-0.67] 0.005                |
| AA x VFA > 13349                     | 1.32          | [0.69-2.53] | 0.4070  |             | 1.29            | [0.64-2.591] | 0.475  | [0.53-3.13] 0.574                |
| <b>Harrell's C-statistic</b>         |               |             |         |             |                 |              |        | 0.7643                           |
| <b>AIC</b>                           |               |             |         |             |                 |              |        | 460.86                           |

**Supplemental online Table 3:** *Univariate analysis for factors associated with overall survival in the cytokine group*

|                                      | <b>HR</b> | <b>IC 95%</b> | <b><i>p</i></b> | <b>Harrell's <i>C</i></b> |
|--------------------------------------|-----------|---------------|-----------------|---------------------------|
| <b>Nephrectomy</b>                   |           |               |                 |                           |
| Yes                                  | 1         |               |                 |                           |
| No                                   | 2.33      | [1.03-5.27]   | 0.043           | 0.545                     |
| <b>Karnofski (%)</b>                 |           |               |                 |                           |
| ≥ 80                                 | 1         |               |                 |                           |
| < 80                                 | 3.03      | [1.15-7.98]   | 0.024           | 0.553                     |
| <b>LDH</b>                           |           |               |                 |                           |
| < 1.5 ULN                            | 1         |               |                 |                           |
| ≥ 1.5 ULN                            | 2.66      | [1.15-6.18]   | 0.023           | 0.564                     |
| <b>Serum corrected calcium</b>       |           |               |                 |                           |
| ≤ULN                                 | 1         |               |                 |                           |
| > ULN                                | 2.03      | [1.01-4.36]   | 0.048           | 0.539                     |
| <b>Platelets</b>                     |           |               |                 |                           |
| < ULN                                | 1         |               |                 |                           |
| ≥ ULN                                | 2.81      | [1.30-6.07]   | 0.009           | 0.579                     |
| <b>Metastatic sites</b>              |           |               |                 |                           |
| 1                                    | 1         |               |                 |                           |
| > 1                                  | 2.80      | [1.43-5.48]   | 0.003           | 0.628                     |
| <b>Antiangiogenic at progression</b> |           |               |                 |                           |
| Yes                                  | 1         |               |                 |                           |
| No                                   | 4.76      | [2.08-11.11]  | <0.0001         | 0.661                     |
| <b>MSKCC group</b>                   |           |               |                 |                           |
| 1                                    | 1         |               |                 |                           |
| 2                                    | 1.95      | [1.17-3.26]   |                 |                           |
| 3                                    | 7.17      | [3.12-16.5]   | <0.0001         | 0.626                     |
